## Correction

# Correction: High LINC01605 expression predicts poor prognosis and promotes tumor progression via upregulation of MMP9 in bladder cancer

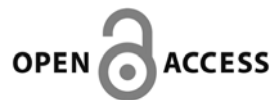

The authors of the original article “High LINC01605 expression predicts poor prognosis and promotes tumor progression via upregulation of MMP9 in bladder cancer” (*Bioscience Reports* (2018) 38(5); <https://doi.org/10.1042/BSR20180562>) would like to provide a correction to Figure 4 of their published paper.

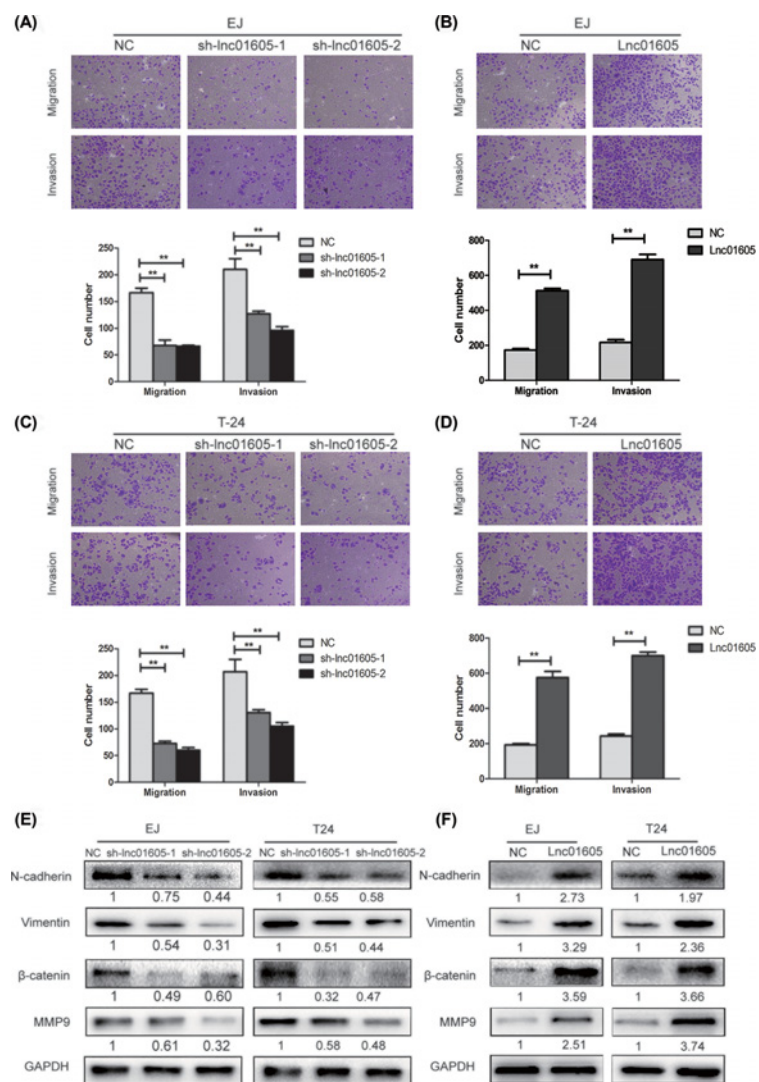

**Figure 4. LINC01605 promotes cell migratory and invasive potential and its underlying mechanism**

(A–D) Transwell migration assay and Matrigel invasion assay in EJ and T24 cells with LINC01605 knockdown or overexpression. (E, F) N-cadherin, Vimentin, β-catenin, MMP9 protein expression levels were analyzed by Western blot in EJ and T24 cells with LINC01605 knockdown or overexpression. Data represent the mean ± S.D. from three independent experiments; \*\*P < 0.01.

Version of Record published:  
12 May 2020

Due to a management error, an incorrect transwell migration image of sh-lnc01605-1 in T24 cells was included. The corrected Figure 4 is shown in this correction article.

The authors apologise for any inconvenience that this error has caused to the readers of their original paper.
